# Supplementary material
Source: PubMed Central journal article supplement (PMC6182774)
Supplement: NIHMS1504930-supplement-125_2018_4697_MOESM1_ESM.pdf [file NIHMS1504930-supplement-125_2018_4697_MOESM1_ESM.pdf]

**ESM Table 1. Major food contributors of gluten and their percentage of contribution at the baseline, mid-point, and most recent FFQs in three cohorts**

| <b>NHS</b>                            |  | <b>%</b> | <b>NHSII</b>                          |  | <b>%</b> | <b>HPFS</b>                           |  | <b>%</b> |
|---------------------------------------|--|----------|---------------------------------------|--|----------|---------------------------------------|--|----------|
| <b>1986</b>                           |  |          | <b>1991</b>                           |  |          | <b>1986</b>                           |  |          |
| Pasta                                 |  | 14.7     | Pasta                                 |  | 21.6     | Cold cereal                           |  | 15.0     |
| Whole wheat/oatmeal/whole grain bread |  | 14.5     | Mix of frozen & restaurant pizza      |  | 14.8     | Whole wheat/oatmeal/whole grain bread |  | 14.4     |
| White bread                           |  | 13.8     | Whole wheat/oatmeal/whole grain bread |  | 12.2     | Pasta                                 |  | 12.6     |
| Cold cereal                           |  | 11.6     | Bagels/English muffins/rolls          |  | 10.4     | Mix of frozen & restaurant pizza      |  | 9.4      |
| Mix of frozen & restaurant pizza      |  | 9.6      | Cold cereal                           |  | 9.0      | White bread                           |  | 9.1      |
| Bagels/English muffins/rolls          |  | 9.2      | White bread                           |  | 7.8      | Bagels/English muffins/rolls          |  | 8.0      |
| Pancakes & waffles                    |  | 3.6      | Pancakes & waffles                    |  | 4.9      | Pancakes & waffles                    |  | 4.0      |
| Fruit Danish pastry                   |  | 2.9      | Muffins or biscuits                   |  | 3.4      | Regular beer                          |  | 3.1      |
| Commercial blueberry muffin           |  | 2.5      | Fruit Danish pastry                   |  | 2.2      | Fruit Danish pastry                   |  | 3.1      |
| Homemade Danish pastry                |  | 2.3      | Wheat crackers                        |  | 1.9      | Canned chicken noodle soup            |  | 2.5      |
| <b>1998</b>                           |  |          | <b>1999</b>                           |  |          | <b>1998</b>                           |  |          |
| Pasta                                 |  | 17.6     | Pasta                                 |  | 20.6     | Pasta                                 |  | 15.7     |
| Whole wheat/oatmeal/whole grain bread |  | 15.4     | Bagels/English muffins/rolls          |  | 11.6     | Whole wheat/oatmeal/whole grain bread |  | 14.9     |
| Cold cereal                           |  | 12.7     | Whole wheat/oatmeal/whole grain bread |  | 10.6     | Cold cereal                           |  | 13.0     |
| Bagels/English muffins/rolls          |  | 10.5     | Cold cereal                           |  | 9.1      | Bagels/English muffins/rolls          |  | 9.6      |
| White bread                           |  | 9.1      | Mix of frozen & restaurant pizza      |  | 8.3      | White bread                           |  | 7.6      |
| Plain, hard, salted pretzels          |  | 6.9      | White bread                           |  | 7.5      | Mix of frozen & restaurant pizza      |  | 5.8      |
| Mix of frozen & restaurant pizza      |  | 5.1      | Plain, hard, salted pretzels          |  | 7.2      | Wheat crackers                        |  | 5.2      |
| Wheat crackers                        |  | 4.2      | Commercially prepared bran muffin     |  | 5.0      | Plain, hard, salted pretzels          |  | 4.6      |
| Commercially prepared bran muffin     |  | 4.0      | Corn tortillas                        |  | 3.6      | Commercially prepared bran muffin     |  | 4.4      |
| Pancakes & waffles                    |  | 1.5      | Wheat crackers                        |  | 3.3      | Corn tortillas                        |  | 1.9      |
| <b>2010</b>                           |  |          | <b>2011</b>                           |  |          | <b>2010</b>                           |  |          |
| Whole wheat/oatmeal/whole grain bread |  | 25.3     | Whole wheat/oatmeal/whole grain bread |  | 22.5     | Whole wheat/oatmeal/whole grain bread |  | 20.7     |
| Pasta                                 |  | 16.8     | Pasta                                 |  | 20.3     | Pasta                                 |  | 15.4     |
| Cold cereal                           |  | 12.3     | Cold cereal                           |  | 10.2     | Cold cereal                           |  | 12.6     |
| White bread                           |  | 5.1      | Mix of frozen & restaurant pizza      |  | 6.7      | Mix of frozen & restaurant pizza      |  | 8.3      |

|                                     |     |                                     |     |                                     |     |
|-------------------------------------|-----|-------------------------------------|-----|-------------------------------------|-----|
| Bagels/English muffins/rolls        | 4.9 | Plain, hard, salted pretzels        | 5.7 | Bagels/English muffins/rolls        | 5.1 |
| Whole wheat crackers                | 4.7 | Bagels/English muffins/rolls        | 5.6 | Whole wheat crackers                | 4.6 |
| Plain, hard, salted pretzels        | 4.3 | Whole wheat crackers                | 5.4 | White bread                         | 3.5 |
| Rye bread                           | 4.2 | White bread                         | 3.2 | Plain, hard, salted pretzels        | 3.4 |
| Mix of regular and low-fat crackers | 4.0 | Mix of regular and low-fat crackers | 2.7 | Mix of regular and low-fat crackers | 3.3 |
| Mix of frozen & restaurant pizza    | 3.5 | Corn tortillas                      | 2.6 | Regular beer                        | 3.2 |

---

**ESM Table 2. Associations between gluten intake (% energy) and type 2 diabetes risk.**

|                                             | Gluten (% energy) |                   |                   |                   |                   | P <sub>trend</sub> |
|---------------------------------------------|-------------------|-------------------|-------------------|-------------------|-------------------|--------------------|
|                                             | Q1                | Q2                | Q3                | Q4                | Q5                |                    |
| <i>Nurses' Health Study</i>                 |                   |                   |                   |                   |                   |                    |
| Case/person year                            | 1574/330169       | 1572/330333       | 1429/330516       | 1291/330647       | 1222/330787       |                    |
| Model 1 <sup>1</sup>                        | 1                 | 1.01 (0.94, 1.08) | 0.92 (0.86, 0.99) | 0.83 (0.77, 0.89) | 0.79 (0.73, 0.85) | <0.0001            |
| Model 2 <sup>2</sup>                        | 1                 | 0.97 (0.90, 1.04) | 0.91 (0.85, 0.98) | 0.84 (0.78, 0.90) | 0.84 (0.78, 0.91) | <0.0001            |
| Model 3 <sup>3</sup>                        | 1                 | 0.97 (0.90, 1.04) | 0.91 (0.84, 0.97) | 0.83 (0.77, 0.90) | 0.85 (0.79, 0.92) | <0.0001            |
| Model 4 <sup>4</sup>                        | 1                 | 1.00 (0.92, 1.07) | 0.95 (0.88, 1.03) | 0.89 (0.82, 0.98) | 0.92 (0.84, 1.02) | 0.03               |
| <i>Nurses' Health Study II</i>              |                   |                   |                   |                   |                   |                    |
| Case/person year                            | 1678/357080       | 1166/357757       | 1004/357885       | 821/357916        | 791/357543        |                    |
| Model 1 <sup>1</sup>                        | 1                 | 0.71 (0.66, 0.77) | 0.62 (0.58, 0.67) | 0.51 (0.47, 0.56) | 0.49 (0.45, 0.54) | <0.0001            |
| Model 2 <sup>2</sup>                        | 1                 | 0.85 (0.79, 0.92) | 0.82 (0.76, 0.89) | 0.72 (0.66, 0.78) | 0.74 (0.68, 0.81) | <0.0001            |
| Model 3 <sup>3</sup>                        | 1                 | 0.86 (0.80, 0.93) | 0.84 (0.78, 0.91) | 0.74 (0.68, 0.81) | 0.77 (0.71, 0.85) | <0.0001            |
| Model 4 <sup>4</sup>                        | 1                 | 0.88 (0.81, 0.96) | 0.88 (0.80, 0.96) | 0.79 (0.71, 0.88) | 0.84 (0.76, 0.94) | <0.0005            |
| <i>Health Professionals Follow-Up Study</i> |                   |                   |                   |                   |                   |                    |
| Case/person year                            | 899/159830        | 731/160226        | 667/160377        | 581/160416        | 521/160259        |                    |
| Model 1 <sup>1</sup>                        | 1                 | 0.83 (0.75, 0.92) | 0.76 (0.69, 0.84) | 0.66 (0.59, 0.73) | 0.60 (0.53, 0.67) | <0.0001            |
| Model 2 <sup>2</sup>                        | 1                 | 0.87 (0.79, 0.96) | 0.84 (0.75, 0.93) | 0.77 (0.69, 0.86) | 0.77 (0.69, 0.86) | <0.0001            |
| Model 3 <sup>3</sup>                        | 1                 | 0.87 (0.78, 0.96) | 0.84 (0.76, 0.93) | 0.78 (0.70, 0.87) | 0.80 (0.71, 0.89) | <0.0001            |
| Model 4 <sup>4</sup>                        | 1                 | 0.89 (0.80, 0.98) | 0.88 (0.78, 0.99) | 0.84 (0.74, 0.96) | 0.90 (0.78, 1.03) | 0.10               |
| <i>Pooled</i>                               |                   |                   |                   |                   |                   |                    |
| Model 1 <sup>1</sup>                        | 1                 | 0.85 (0.81, 0.89) | 0.77 (0.73, 0.80) | 0.66 (0.63, 0.70) | 0.63 (0.60, 0.66) | <0.0001            |
| Model 2 <sup>2</sup>                        | 1                 | 0.90 (0.86, 0.94) | 0.85 (0.81, 0.90) | 0.77 (0.74, 0.81) | 0.78 (0.75, 0.82) | <0.0001            |
| Model 3 <sup>3</sup>                        | 1                 | 0.90 (0.86, 0.94) | 0.86 (0.82, 0.90) | 0.78 (0.74, 0.82) | 0.80 (0.76, 0.85) | <0.0001            |
| Model 4 <sup>4</sup>                        | 1                 | 0.92 (0.88, 0.97) | 0.91 (0.86, 0.96) | 0.84 (0.79, 0.89) | 0.88 (0.83, 0.94) | <0.0001            |

<sup>1</sup>, estimates are calculated in Cox proportional hazards models. Model 1, adjusted for age;<sup>2</sup>, model 2, further adjusted for ethnicity (White, African American, Asian, and other ethnicity), family history of diabetes (yes/no), smoking status (never, former, current (1–14, 15–24, or ≥25 cigarettes/day), or missing), alcohol intake (gram/day: 0, 0.1–4.9, 5.0–14.9, and >15.0 in women, 0, 0.1–4.9, 5.0–29.9, and >30.0 in men, or missing), physical activity (<3, 3.0–8.9, 9.0–17.9, 18.0–26.9, ≥27.0 MET (metabolic equivalent of task) hours/week, or missing), menopausal status and post-menopausal hormone use (pre-menopause, post-menopause (never, former, or current hormone use), or missing, for women), oral contraceptive use (yes, no, or missing, for Nurses' Health Study II), multivitamin use (yes/no), BMI (<23, 23–24.9, 25–29.9, 30–34.9, >35kg/m<sup>2</sup>, or missing), and total energy intake based on model 1;<sup>3</sup>, model 3, further adjusted for AHEI (in quintiles), folic acid intake (in quintiles), and magnesium intake (in quintiles) based on model 2;<sup>4</sup>, model 4, further adjusted for cereal fibre intake based on model 3.

**ESM Table 3. Spearman correlations of gluten intake with dietary carbohydrate components at the midpoint of follow-up (NHS1998, NHSII 2001, HPFS1998)**

|                 | <b>NHS</b> | <b>NHSII</b> | <b>HPFS</b> |
|-----------------|------------|--------------|-------------|
| Whole grain     | 0.38       | 0.33         | 0.43        |
| Refined grain   | 0.65       | 0.71         | 0.62        |
| Bran            | 0.30       | 0.25         | 0.32        |
| Germ            | 0.19       | 0.17         | 0.22        |
| Starch          | 0.71       | 0.71         | 0.61        |
| Glycaemic index | 0.30       | 0.25         | 0.29        |
| Glycaemic load  | 0.35       | 0.32         | 0.41        |
| Cereal fibre    | 0.61       | 0.61         | 0.63        |

All P values <0.0001.

**ESM Table 4. Associations between and type 2 diabetes adjusting for carbohydrate components.<sup>1</sup>**

| <b>Further adjusting for refined grain intake</b>                          |   |                   |                   |                   |                   |         |
|----------------------------------------------------------------------------|---|-------------------|-------------------|-------------------|-------------------|---------|
| NHS                                                                        | 1 | 0.90 (0.83, 0.97) | 0.79 (0.73, 0.86) | 0.74 (0.67, 0.81) | 0.73 (0.66, 0.81) | <0.001  |
| NHSII                                                                      | 1 | 0.83 (0.76, 0.91) | 0.78 (0.70, 0.86) | 0.69 (0.62, 0.77) | 0.69 (0.61, 0.78) | <0.001  |
| HPFS                                                                       | 1 | 0.82 (0.73, 0.91) | 0.79 (0.70, 0.89) | 0.72 (0.63, 0.82) | 0.73 (0.63, 0.84) | <0.001  |
| Pooled                                                                     | 1 | 0.85 (0.81, 0.90) | 0.78 (0.74, 0.83) | 0.71 (0.67, 0.76) | 0.71 (0.66, 0.76) | <0.001  |
| <b>Further adjusting for whole grain intake</b>                            |   |                   |                   |                   |                   |         |
| NHS                                                                        | 1 | 0.96 (0.89, 1.03) | 0.88 (0.81, 0.94) | 0.84 (0.78, 0.91) | 0.85 (0.79, 0.92) | <0.001  |
| NHSII                                                                      | 1 | 0.89 (0.82, 0.96) | 0.86 (0.79, 0.93) | 0.78 (0.72, 0.85) | 0.81 (0.74, 0.89) | <0.001  |
| HPFS                                                                       | 1 | 0.87 (0.78, 0.96) | 0.85 (0.76, 0.94) | 0.78 (0.70, 0.87) | 0.81 (0.72, 0.91) | <0.001  |
| Pooled                                                                     | 1 | 0.90 (0.86, 0.95) | 0.86 (0.82, 0.90) | 0.80 (0.76, 0.84) | 0.82 (0.78, 0.87) | <0.001  |
| <b>Further adjusting for glycaemic index and glycaemic load</b>            |   |                   |                   |                   |                   |         |
| NHS                                                                        | 1 | 0.94 (0.87, 1.01) | 0.85 (0.79, 0.91) | 0.80 (0.74, 0.86) | 0.78 (0.72, 0.85) | <0.001  |
| NHSII                                                                      | 1 | 0.87 (0.80, 0.94) | 0.83 (0.77, 0.90) | 0.75 (0.69, 0.82) | 0.76 (0.69, 0.83) | <0.001  |
| HPFS                                                                       | 1 | 0.85 (0.77, 0.94) | 0.82 (0.74, 0.92) | 0.75 (0.67, 0.84) | 0.78 (0.69, 0.88) | <0.001  |
| Pooled                                                                     | 1 | 0.89 (0.85, 0.93) | 0.83 (0.79, 0.87) | 0.76 (0.72, 0.80) | 0.76 (0.72, 0.80) | <0.001  |
| <b>Further adjusting for bran, germ, and starch</b>                        |   |                   |                   |                   |                   |         |
| NHS                                                                        | 1 | 0.90 (0.84, 0.98) | 0.80 (0.74, 0.87) | 0.75 (0.68, 0.82) | 0.74 (0.67, 0.82) | <0.001  |
| NHSII                                                                      | 1 | 0.86 (0.80, 0.94) | 0.82 (0.75, 0.90) | 0.73 (0.65, 0.81) | 0.72 (0.64, 0.81) | <0.001  |
| HPFS                                                                       | 1 | 0.85 (0.76, 0.94) | 0.82 (0.73, 0.92) | 0.75 (0.66, 0.84) | 0.78 (0.68, 0.90) | 0.0001  |
| Pooled                                                                     | 1 | 0.87 (0.83, 0.92) | 0.81 (0.76, 0.85) | 0.73 (0.69, 0.78) | 0.74 (0.69, 0.79) | <0.001  |
| <b>Using whole grain adjusted gluten intake as exposure <sup>2</sup></b>   |   |                   |                   |                   |                   |         |
| NHS                                                                        | 1 | 0.94 (0.87, 1.01) | 0.96 (0.88, 1.03) | 0.90 (0.83, 0.98) | 0.89 (0.82, 0.97) | 0.008   |
| NHSII                                                                      | 1 | 0.84 (0.77, 0.91) | 0.85 (0.78, 0.92) | 0.78 (0.71, 0.85) | 0.81 (0.73, 0.89) | <0.0001 |
| HPFS                                                                       | 1 | 0.93 (0.84, 1.03) | 0.88 (0.79, 0.98) | 0.87 (0.77, 0.97) | 0.85 (0.75, 0.96) | 0.004   |
| Pooled                                                                     | 1 | 0.89 (0.85, 0.93) | 0.89 (0.85, 0.94) | 0.84 (0.80, 0.89) | 0.84 (0.79, 0.89) | <0.0001 |
| <b>Using refined grain adjusted gluten intake as exposure <sup>2</sup></b> |   |                   |                   |                   |                   |         |
| NHS                                                                        | 1 | 1.01 (0.94, 1.09) | 0.91 (0.84, 0.98) | 0.90 (0.82, 0.98) | 0.82 (0.74, 0.92) | <0.0001 |
| NHSII                                                                      | 1 | 0.87 (0.81, 0.94) | 0.82 (0.75, 0.89) | 0.83 (0.75, 0.91) | 0.82 (0.73, 0.92) | <0.0001 |
| HPFS                                                                       | 1 | 0.92 (0.83, 1.02) | 0.83 (0.74, 0.93) | 0.81 (0.71, 0.92) | 0.82 (0.71, 0.96) | 0.002   |
| Pooled                                                                     | 1 | 0.94 (0.89, 0.98) | 0.86 (0.81, 0.90) | 0.85 (0.80, 0.90) | 0.82 (0.76, 0.88) | <0.0001 |

Abbreviations: NHS, Nurses' Health Study; NHSII, Nurses' Health Study; HPFS, the Health Professionals Follow-Up Study.

<sup>1</sup>, model was adjusted for age, ethnicity (White, African American, Asian, and other ethnicity), family history of diabetes (yes/no), smoking status (never, former, current (1–14, 15–24, or ≥25 cigarettes/day), or missing), alcohol intake (gram/day: 0, 0.1–4.9, 5.0–14.9, and >15.0 in women, 0, 0.1–4.9, 5.0–29.9, and >30.0 in men, or missing), physical activity (<3, 3.0–8.9, 9.0–17.9, 18.0–26.9, ≥27.0 MET (metabolic equivalent of task) hours/week, or missing), menopausal status and post-menopausal hormone use (pre-menopause, post-menopause (never, former, or current hormone use), or missing, for women), oral contraceptive use (yes, no, or missing, for Nurses' Health Study II), multivitamin use (yes/no), total energy intake, BMI (<23, 23–24.9, 25–29.9, 30–34.9, >35kg/m<sup>2</sup>, or missing), AHEI (in quintiles), folic acid intake (in quintiles), and magnesium intake (in quintiles).

**ESM Table 5. Stratified analysis of associations between gluten intake and type 2 diabetes risk.<sup>1</sup>**

|                   |                      | Quintiles of saturated fatty acid intake (% energy) |                   |                   |                   |                   | P <sub>trend</sub> | P <sub>interaction</sub> |
|-------------------|----------------------|-----------------------------------------------------|-------------------|-------------------|-------------------|-------------------|--------------------|--------------------------|
|                   |                      | Q1                                                  | Q2                | Q3                | Q4                | Q5                |                    |                          |
| Age               | <65yrs               | 1                                                   | 0.91 (0.86, 0.96) | 0.88 (0.83, 0.94) | 0.82 (0.77, 0.88) | 0.85 (0.78, 0.92) | <0.0001            | 0.002                    |
|                   | ≥65yrs               | 1                                                   | 0.94 (0.86, 1.02) | 0.90 (0.81, 0.99) | 0.87 (0.79, 0.97) | 0.93 (0.83, 1.04) | 0.06               |                          |
| BMI               | <25kg/m <sup>2</sup> | 1                                                   | 0.86 (0.80, 0.93) | 0.84 (0.78, 0.91) | 0.79 (0.72, 0.87) | 0.80 (0.73, 0.89) | <0.0001            | <0.0001                  |
|                   | ≥25kg/m <sup>2</sup> | 1                                                   | 0.95 (0.89, 1.01) | 0.91 (0.85, 0.98) | 0.85 (0.79, 0.92) | 0.91 (0.83, 1.00) | 0.003              |                          |
| Physical activity | <18 METs/week        | 1                                                   | 0.94 (0.88, 1.00) | 0.89 (0.84, 0.95) | 0.86 (0.80, 0.93) | 0.88 (0.81, 0.96) | 0.0002             | 0.03                     |
|                   | ≥18 METs/week        | 1                                                   | 0.85 (0.77, 0.93) | 0.85 (0.76, 0.94) | 0.77 (0.68, 0.86) | 0.81 (0.71, 0.92) | 0.0004             |                          |
| Current smoking   | No                   | 1                                                   | 0.92 (0.88, 0.97) | 0.88 (0.83, 0.93) | 0.83 (0.78, 0.89) | 0.87 (0.81, 0.93) | <0.0001            | 0.83                     |
|                   | Yes                  | 1                                                   | 0.82 (0.70, 0.97) | 0.91 (0.75, 1.09) | 0.77 (0.62, 0.96) | 0.86 (0.67, 1.10) | 0.17               |                          |

<sup>1</sup>, model was adjusted for age, ethnicity (White, African American, Asian, and other ethnicity), family history of diabetes (yes/no), smoking status (never, former, current (1–14, 15–24, or ≥25 cigarettes/day), or missing), alcohol intake (gram/day: 0, 0.1–4.9, 5.0–14.9, and >15.0 in women, 0, 0.1–4.9, 5.0–29.9, and >30.0 in men, or missing), physical activity (<3, 3.0–8.9, 9.0–17.9, 18.0–26.9, ≥27.0 MET (metabolic equivalent of task) hours/week, or missing), menopausal status and post-menopausal hormone use (pre-menopause, post-menopause (never, former, or current hormone use), or missing, for women), oral contraceptive use (yes, no, or missing, for Nurses' Health Study II), multivitamin use (yes/no), total energy intake, BMI (<23, 23–24.9, 25–29.9, 30–34.9, >35kg/m<sup>2</sup>, or missing), AHEI (in quintiles), folic acid intake(in quintiles), magnesium intake(in quintiles), and cereal fibre intake (in quintiles).

**ESM Table 6. Sensitivity analysis on associations between gluten intake and diabetes risk.<sup>1</sup>**

| <b>Using individual diet components as covariates</b> |   |                   |                   |                   |                   |         |
|-------------------------------------------------------|---|-------------------|-------------------|-------------------|-------------------|---------|
| NHS                                                   | 1 | 0.98 (0.91, 1.06) | 0.92 (0.85, 1.00) | 0.90 (0.82, 0.98) | 0.94 (0.85, 1.04) | 0.08    |
| NHSII                                                 | 1 | 0.90 (0.83, 0.98) | 0.89 (0.81, 0.98) | 0.82 (0.74, 0.91) | 0.86 (0.76, 0.96) | 0.002   |
| HPFS                                                  | 1 | 0.89 (0.80, 0.99) | 0.90 (0.80, 1.01) | 0.86 (0.75, 0.97) | 0.94 (0.81, 1.09) | 0.31    |
| Pooled                                                | 1 | 0.93 (0.88, 0.97) | 0.90 (0.85, 0.95) | 0.86 (0.81, 0.91) | 0.90 (0.84, 0.96) | <0.0001 |
| <b>Using baseline gluten intake as exposure</b>       |   |                   |                   |                   |                   |         |
| NHS                                                   | 1 | 0.98 (0.91, 1.06) | 0.92 (0.86, 1.00) | 0.94 (0.87, 1.02) | 0.89 (0.82, 0.97) | 0.007   |
| NHSII                                                 | 1 | 0.91 (0.84, 0.98) | 0.94 (0.86, 1.02) | 0.91 (0.83, 0.99) | 0.89 (0.80, 0.98) | 0.03    |
| HPFS                                                  | 1 | 0.95 (0.85, 1.05) | 0.91 (0.81, 1.01) | 0.92 (0.82, 1.03) | 0.97 (0.85, 1.10) | 0.51    |
| Pooled                                                | 1 | 0.94 (0.90, 0.99) | 0.92 (0.87, 0.97) | 0.92 (0.87, 0.97) | 0.90 (0.85, 0.95) | 0.0004  |
| <b>Using baseline BMI as covariate</b>                |   |                   |                   |                   |                   |         |
| NHS                                                   | 1 | 0.97 (0.90, 1.05) | 0.90 (0.83, 0.97) | 0.86 (0.79, 0.94) | 0.88 (0.80, 0.97) | 0.002   |
| NHSII                                                 | 1 | 0.88 (0.81, 0.96) | 0.88 (0.80, 0.96) | 0.79 (0.71, 0.88) | 0.84 (0.75, 0.94) | 0.0005  |
| HPFS                                                  | 1 | 0.89 (0.80, 0.99) | 0.90 (0.80, 1.01) | 0.86 (0.75, 0.97) | 0.94 (0.81, 1.09) | 0.009   |
| Pooled                                                | 1 | 0.91 (0.87, 0.96) | 0.87 (0.83, 0.92) | 0.81 (0.77, 0.86) | 0.85 (0.79, 0.90) | <0.0001 |

Abbreviations: NHS, Nurses' Health Study; NHSII, Nurses' Health Study; HPFS, the Health Professionals Follow-Up Study.

<sup>1</sup>, model was adjusted for age, ethnicity (White, African American, Asian, and other ethnicity), family history of diabetes (yes/no), smoking status (never, former, current (1–14, 15–24, or ≥25 cigarettes/day), or missing), alcohol intake (gram/day: 0, 0.1–4.9, 5.0–14.9, and >15.0 in women, 0, 0.1–4.9, 5.0–29.9, and >30.0 in men, or missing), physical activity (<3, 3.0–8.9, 9.0–17.9, 18.0–26.9, ≥27.0 MET (metabolic equivalent of task) hours/week, or missing), menopausal status and post-menopausal hormone use (pre-menopause, post-menopause (never, former, or current hormone use), or missing, for women), oral contraceptive use (yes, no, or missing, for Nurses' Health Study II), multivitamin use (yes/no), total energy intake, BMI (<23, 23–24.9, 25–29.9, 30–34.9, >35kg/m<sup>2</sup>, or missing), AHEI (in quintiles, not adjusted when using individual diet components as covariates), folic acid intake (in quintiles), magnesium intake (in quintiles), and cereal fibre intake (in quintiles).

**ESM Table 7. Associations between gluten intake and diabetes risk after excluding participants with CD. <sup>1</sup>**

|        | <b>Q1</b> | <b>Q2</b>         | <b>Q3</b>         | <b>Q4</b>         | <b>Q5</b>         | <b>P<sub>trend</sub></b> |
|--------|-----------|-------------------|-------------------|-------------------|-------------------|--------------------------|
| NHS    | 1         | 0.97 (0.90, 1.04) | 0.90 (0.83, 0.97) | 0.87 (0.80, 0.95) | 0.89 (0.81, 0.99) | 0.008                    |
| HPFS   | 1         | 0.87 (0.79, 0.97) | 0.88 (0.78, 0.98) | 0.82 (0.72, 0.93) | 0.88 (0.76, 1.02) | 0.06                     |
| Pooled | 1         | 0.94 (0.88, 1.00) | 0.89 (0.83, 0.95) | 0.85 (0.79, 0.92) | 0.89 (0.82, 0.96) | 0.0007                   |

Abbreviations: NHS, Nurses' Health Study; HPFS, the Health Professionals Follow-Up Study.

<sup>1</sup>, model was adjusted for age, ethnicity (White, African American, Asian, and other ethnicity), family history of diabetes (yes/no), smoking status (never, former, current (1–14, 15–24, or ≥25 cigarettes/day), or missing), alcohol intake (gram/day: 0, 0.1–4.9, 5.0–14.9, and >15.0 in women, 0, 0.1–4.9, 5.0–29.9, and >30.0 in men, or missing), physical activity (<3, 3.0–8.9, 9.0–17.9, 18.0–26.9, ≥27.0 MET (metabolic equivalent of task) hours/week, or missing), menopausal status and post-menopausal hormone use (pre-menopause, post-menopause (never, former, or current hormone use), or missing, for women), oral contraceptive use (yes, no, or missing, for Nurses' Health Study II), multivitamin use (yes/no), total energy intake, BMI (<23, 23–24.9, 25–29.9, 30–34.9, >35kg/m<sup>2</sup>, or missing), AHEI (in quintiles, not adjusted when using individual diet components as covariates), folic acid intake (in quintiles), magnesium intake (in quintiles), and cereal fibre intake (in quintiles).
